# Supplementary material
Source: publisher figshare collection journal article supplement (https://acs.figshare.com/ndownloader/files/5182969)
Supplement: Supplementary file 1 [file 5182969]

  
data_w275 
  
_audit_creation_method            SHELXL-97 
_chemical_name_systematic 
; 
 ? 
; 
_chemical_name_common             ? 
_chemical_melting_point           ? 
_chemical_formula_moiety          ? 
_chemical_formula_sum 
 'Al56.61 Ge2.39 Mn14' 
_chemical_formula_weight          2469.99 
  
loop_ 
 _atom_type_symbol 
 _atom_type_description 
 _atom_type_scat_dispersion_real 
 _atom_type_scat_dispersion_imag 
 _atom_type_scat_source 
 'Al'  'Al'   0.0645   0.0514 
 'International Tables Vol C Tables 4.2.6.8 and 6.1.1.4' 
 'Mn'  'Mn'   0.3368   0.7283 
 'International Tables Vol C Tables 4.2.6.8 and 6.1.1.4' 
 'Ge'  'Ge'   0.1547   1.8001 
 'International Tables Vol C Tables 4.2.6.8 and 6.1.1.4' 
  
_symmetry_cell_setting            Trigonal 
_symmetry_space_group_name_H-M    P-3 
  
loop_ 
 _symmetry_equiv_pos_as_xyz 
 'x, y, z' 
 '-y, x-y, z' 
 '-x+y, -x, z' 
 '-x, -y, -z' 
 'y, -x+y, -z' 
 'x-y, x, -z' 
  
_cell_length_a                    11.103(2) 
_cell_length_b                    11.103(2) 
_cell_length_c                    10.3537(19) 
_cell_angle_alpha                 90.000(4) 
_cell_angle_beta                  90.000(4) 
_cell_angle_gamma                 120.000(4) 
_cell_volume                      1105.4(3) 
_cell_formula_units_Z             1 
_cell_measurement_temperature     298(2) 
_cell_measurement_reflns_used     ? 
_cell_measurement_theta_min       ? 
_cell_measurement_theta_max       ? 
  
_exptl_crystal_description        'Block'  
_exptl_crystal_colour             'Silvery' 
_exptl_crystal_size_max           0.08 
_exptl_crystal_size_mid           0.06 
_exptl_crystal_size_min           0.04 
_exptl_crystal_density_meas       ? 
_exptl_crystal_density_diffrn     3.710 
_exptl_crystal_density_method     'not measured' 
_exptl_crystal_F_000              1162 
_exptl_absorpt_coefficient_mu     6.593 
_exptl_absorpt_correction_type    empirical 
_exptl_absorpt_correction_T_min   ? 
_exptl_absorpt_correction_T_max   ? 
_exptl_absorpt_process_details    'SADABS (Sheldrick, 1996)' 
  
_exptl_special_details 
; 
 ? 
; 
  
_diffrn_ambient_temperature       298(2) 
_diffrn_radiation_wavelength      0.71073 
_diffrn_radiation_type            MoK\a 
_diffrn_radiation_source          'fine-focus sealed tube' 
_diffrn_radiation_monochromator   graphite 
_diffrn_measurement_device_type   'CCD area detector' 
_diffrn_measurement_method        'phi and omega scans' 
_diffrn_detector_area_resol_mean  ? 
_diffrn_standards_number          none 
_diffrn_standards_interval_count  none 
_diffrn_standards_interval_time   none 
_diffrn_standards_decay_%         none 
_diffrn_reflns_number             13161 
_diffrn_reflns_av_R_equivalents   0.0540 
_diffrn_reflns_av_sigmaI/netI     0.0445 
_diffrn_reflns_limit_h_min        -15 
_diffrn_reflns_limit_h_max        15 
_diffrn_reflns_limit_k_min        -15 
_diffrn_reflns_limit_k_max        15 
_diffrn_reflns_limit_l_min        -14 
_diffrn_reflns_limit_l_max        14 
_diffrn_reflns_theta_min          1.97 
_diffrn_reflns_theta_max          30.00 
_reflns_number_total              2170 
_reflns_number_gt                 1935 
_reflns_threshold_expression      >2sigma(I) 
  
_computing_data_collection        'Bruker SMART' 
_computing_cell_refinement        'Bruker SMART' 
_computing_data_reduction         'Bruker SHELXTL' 
_computing_structure_solution     'SHELXS-97 (Sheldrick, 1990)' 
_computing_structure_refinement   'SHELXL-97 (Sheldrick, 1997)' 
_computing_molecular_graphics     'Bruker SHELXTL' 
_computing_publication_material   'Bruker SHELXTL' 
  
_refine_special_details 
; 
 Refinement of F^2^ against ALL reflections.  The weighted R-factor wR and 
 goodness of fit S are based on F^2^, conventional R-factors R are based 
 on F, with F set to zero for negative F^2^. The threshold expression of 
 F^2^ > 2sigma(F^2^) is used only for calculating R-factors(gt) etc. and is 
 not relevant to the choice of reflections for refinement.  R-factors based 
 on F^2^ are statistically about twice as large as those based on F, and R- 
 factors based on ALL data will be even larger. 
; 
  
_refine_ls_structure_factor_coef  Fsqd 
_refine_ls_matrix_type            full 
_refine_ls_weighting_scheme       calc 
_refine_ls_weighting_details 
 'calc w=1/[\s^2^(Fo^2^)+(0.0208P)^2^+0.0000P] where P=(Fo^2^+2Fc^2^)/3' 
_atom_sites_solution_primary      direct 
_atom_sites_solution_secondary    difmap 
_atom_sites_solution_hydrogens    geom 
_refine_ls_hydrogen_treatment     mixed 
_refine_ls_extinction_method      SHELXL 
_refine_ls_extinction_coef        0.0040(2) 
_refine_ls_extinction_expression 
 'Fc^*^=kFc[1+0.001xFc^2^\l^3^/sin(2\q)]^-1/4^' 
_refine_ls_number_reflns          2170 
_refine_ls_number_parameters      114 
_refine_ls_number_restraints      1 
_refine_ls_R_factor_all           0.0454 
_refine_ls_R_factor_gt            0.0376 
_refine_ls_wR_factor_ref          0.0679 
_refine_ls_wR_factor_gt           0.0650 
_refine_ls_goodness_of_fit_ref    1.077 
_refine_ls_restrained_S_all       1.077 
_refine_ls_shift/su_max           0.000 
_refine_ls_shift/su_mean          0.000 
  
loop_ 
 _atom_site_label 
 _atom_site_type_symbol 
 _atom_site_fract_x 
 _atom_site_fract_y 
 _atom_site_fract_z 
 _atom_site_U_iso_or_equiv 
 _atom_site_adp_type 
 _atom_site_occupancy 
 _atom_site_symmetry_multiplicity 
 _atom_site_calc_flag 
 _atom_site_refinement_flags 
 _atom_site_disorder_assembly 
 _atom_site_disorder_group 
Mn1 Mn 0.3333 0.6667 0.44421(8) 0.00479(18) Uani 1 3 d S . . 
Mn2 Mn 0.36059(5) 0.42289(5) 0.07088(5) 0.00568(12) Uani 1 1 d . . . 
Mn3 Mn 0.25781(5) 0.04847(5) 0.33096(5) 0.00574(12) Uani 1 1 d . . . 
Ge1 Ge 0.0000 0.0000 0.0000 0.00806(19) Uani 1 6 d S . . 
Ge2 Ge 0.3333 0.6667 0.71973(8) 0.0108(2) Uani 0.694(3) 3 d SP . . 
Al12 Al 0.3333 0.6667 0.71973(8) 0.0108(2) Uani 0.306(3) 3 d SP . . 
Al1 Al 0.0000 0.0000 0.74460(18) 0.0099(4) Uani 1 3 d S . . 
Al2 Al 0.26221(11) 0.13086(11) 0.08417(10) 0.0095(2) Uani 1 1 d . . . 
Al3 Al 0.49286(11) 0.11534(11) 0.43725(10) 0.0102(2) Uani 1 1 d . . . 
Al4 Al 0.13788(11) 0.41731(11) 0.45158(11) 0.0118(2) Uani 1 1 d . . . 
Al5 Al 0.16840(12) 0.62538(12) 0.27216(11) 0.0125(2) Uani 1 1 d . . . 
Al6 Al 0.19212(11) 0.51324(11) 0.01470(10) 0.0089(2) Uani 1 1 d . . . 
Al7 Al 0.44846(11) 0.06404(11) 0.17190(10) 0.0095(2) Uani 1 1 d . . . 
Al8 Al 0.40681(11) 0.30502(11) 0.26899(10) 0.0089(2) Uani 1 1 d . . . 
Al9 Al 0.14509(11) 0.29951(12) 0.18758(10) 0.0110(2) Uani 1 1 d . . . 
Al10 Al 0.16705(11) 0.19580(11) 0.42203(10) 0.0094(2) Uani 1 1 d . . . 
  
loop_ 
 _atom_site_aniso_label 
 _atom_site_aniso_U_11 
 _atom_site_aniso_U_22 
 _atom_site_aniso_U_33 
 _atom_site_aniso_U_23 
 _atom_site_aniso_U_13 
 _atom_site_aniso_U_12 
Mn1 0.0044(3) 0.0044(3) 0.0055(4) 0.000 0.000 0.00221(13) 
Mn2 0.0057(2) 0.0057(2) 0.0056(2) -0.00002(19) 0.00031(19) 0.0028(2) 
Mn3 0.0055(2) 0.0057(2) 0.0060(2) 0.00029(19) 0.00050(19) 0.0028(2) 
Ge1 0.0076(3) 0.0076(3) 0.0090(4) 0.000 0.000 0.00380(13) 
Ge2 0.0091(3) 0.0091(3) 0.0143(4) 0.000 0.000 0.00455(14) 
Al12 0.0091(3) 0.0091(3) 0.0143(4) 0.000 0.000 0.00455(14) 
Al1 0.0094(6) 0.0094(6) 0.0109(9) 0.000 0.000 0.0047(3) 
Al2 0.0083(5) 0.0106(5) 0.0087(5) -0.0005(4) -0.0005(4) 0.0040(4) 
Al3 0.0093(5) 0.0097(5) 0.0115(5) -0.0025(4) -0.0022(4) 0.0045(4) 
Al4 0.0078(5) 0.0082(5) 0.0178(6) -0.0029(4) 0.0000(4) 0.0027(4) 
Al5 0.0134(6) 0.0153(6) 0.0100(5) -0.0022(4) -0.0058(4) 0.0081(5) 
Al6 0.0084(5) 0.0082(5) 0.0110(5) -0.0006(4) 0.0002(4) 0.0047(4) 
Al7 0.0108(5) 0.0129(5) 0.0069(5) 0.0003(4) 0.0003(4) 0.0074(5) 
Al8 0.0088(5) 0.0078(5) 0.0090(5) 0.0011(4) 0.0007(4) 0.0034(4) 
Al9 0.0080(5) 0.0134(6) 0.0100(5) 0.0014(4) 0.0021(4) 0.0041(4) 
Al10 0.0122(5) 0.0115(5) 0.0076(5) -0.0007(4) -0.0005(4) 0.0083(5) 
  
_geom_special_details 
; 
 All esds (except the esd in the dihedral angle between two l.s. planes) 
 are estimated using the full covariance matrix.  The cell esds are taken 
 into account individually in the estimation of esds in distances, angles 
 and torsion angles; correlations between esds in cell parameters are only 
 used when they are defined by crystal symmetry.  An approximate (isotropic) 
 treatment of cell esds is used for estimating esds involving l.s. planes. 
; 
  
loop_ 
 _geom_bond_atom_site_label_1 
 _geom_bond_atom_site_label_2 
 _geom_bond_distance 
 _geom_bond_site_symmetry_2 
 _geom_bond_publ_flag 
Mn1 Al5 2.4285(13) . ? 
Mn1 Al5 2.4285(13) 3_565 ? 
Mn1 Al5 2.4285(13) 2_665 ? 
Mn1 Al4 2.5244(12) 3_565 ? 
Mn1 Al4 2.5244(12) . ? 
Mn1 Al4 2.5244(12) 2_665 ? 
Mn1 Al3 2.5334(12) 4_666 ? 
Mn1 Al3 2.5334(12) 5_566 ? 
Mn1 Al3 2.5334(12) 6_556 ? 
Mn1 Ge2 2.8527(13) . ? 
Mn2 Al9 2.4050(12) . ? 
Mn2 Al5 2.4370(12) 2_665 ? 
Mn2 Al7 2.5286(13) 6 ? 
Mn2 Al6 2.5295(12) 2_665 ? 
Mn2 Al6 2.5923(12) . ? 
Mn2 Al6 2.6172(12) 5 ? 
Mn2 Al8 2.6183(12) . ? 
Mn2 Al7 2.6658(12) 3_665 ? 
Mn2 Al2 2.7744(12) 6 ? 
Mn2 Al2 2.8607(13) . ? 
Mn2 Mn2 3.0609(11) 4_665 ? 
Mn3 Al9 2.3819(12) 3 ? 
Mn3 Al10 2.4958(12) . ? 
Mn3 Al4 2.5288(13) 3 ? 
Mn3 Al8 2.5593(13) . ? 
Mn3 Al3 2.5760(12) . ? 
Mn3 Al7 2.6186(12) . ? 
Mn3 Al10 2.6290(12) 5_556 ? 
Mn3 Al10 2.6454(13) 3 ? 
Mn3 Al2 2.7063(12) . ? 
Mn3 Al1 2.7488(8) 4 ? 
Ge1 Al1 2.6443(19) . ? 
Ge1 Al1 2.6443(19) 4 ? 
Ge1 Al2 2.6677(11) 4 ? 
Ge1 Al2 2.6677(11) . ? 
Ge1 Al2 2.6677(11) 6 ? 
Ge1 Al2 2.6677(11) 3 ? 
Ge1 Al2 2.6677(11) 5 ? 
Ge1 Al2 2.6677(11) 2 ? 
Ge2 Al8 2.7441(12) 5_566 ? 
Ge2 Al8 2.7441(12) 6_556 ? 
Ge2 Al8 2.7441(12) 4_666 ? 
Ge2 Al3 2.7484(13) 5_566 ? 
Ge2 Al3 2.7484(13) 4_666 ? 
Ge2 Al3 2.7484(13) 6_556 ? 
Al1 Al10 2.6666(16) 4 ? 
Al1 Al10 2.6666(16) 6 ? 
Al1 Al10 2.6666(16) 5 ? 
Al1 Mn3 2.7488(8) 6 ? 
Al1 Mn3 2.7487(8) 5 ? 
Al1 Mn3 2.7488(8) 4 ? 
Al1 Al9 2.9648(13) 5 ? 
Al1 Al9 2.9648(13) 4 ? 
Al1 Al9 2.9648(13) 6 ? 
Al2 Al8 2.6219(15) . ? 
Al2 Al7 2.6807(16) . ? 
Al2 Al6 2.7186(16) 5 ? 
Al2 Mn2 2.7744(12) 5 ? 
Al2 Al9 2.8369(16) 5 ? 
Al2 Al9 2.8809(16) 3 ? 
Al2 Al9 2.9630(16) . ? 
Al3 Mn1 2.5334(12) 4_666 ? 
Al3 Al4 2.6223(16) 5_556 ? 
Al3 Al4 2.6230(16) 3 ? 
Al3 Al4 2.6734(15) 6_656 ? 
Al3 Al12 2.7484(13) 4_666 ? 
Al3 Ge2 2.7484(13) 4_666 ? 
Al3 Al7 2.7990(16) . ? 
Al3 Al8 2.9037(15) 2_655 ? 
Al3 Al3 2.946(2) 4_656 ? 
Al4 Mn3 2.5288(13) 2 ? 
Al4 Al3 2.6223(16) 6_556 ? 
Al4 Al3 2.6230(16) 2 ? 
Al4 Al10 2.6541(16) . ? 
Al4 Al3 2.6734(15) 5_566 ? 
Al4 Al10 2.7777(16) 6_556 ? 
Al4 Al5 2.8496(16) . ? 
Al4 Al8 2.9151(16) 6_556 ? 
Al4 Al5 2.9393(16) 2_665 ? 
Al5 Mn2 2.4370(12) 3_565 ? 
Al5 Al9 2.7716(16) 3_565 ? 
Al5 Al7 2.8270(16) 2 ? 
Al5 Al8 2.8385(16) 3_565 ? 
Al5 Al5 2.859(2) 3_565 ? 
Al5 Al5 2.859(2) 2_665 ? 
Al5 Al4 2.9393(16) 3_565 ? 
Al6 Mn2 2.5295(12) 3_565 ? 
Al6 Mn2 2.6172(12) 6 ? 
Al6 Al2 2.7186(16) 6 ? 
Al6 Al9 2.8052(16) . ? 
Al6 Al6 2.8405(19) 2_665 ? 
Al6 Al6 2.8405(19) 3_565 ? 
Al6 Al7 2.9432(15) 5_565 ? 
Al6 Al7 2.9524(15) 2 ? 
Al7 Mn2 2.5286(12) 5 ? 
Al7 Mn2 2.6658(12) 2_655 ? 
Al7 Al8 2.7443(16) 2_655 ? 
Al7 Al5 2.8270(16) 3 ? 
Al7 Al9 2.9148(16) 3 ? 
Al7 Al6 2.9432(15) 6_655 ? 
Al7 Al6 2.9524(15) 3 ? 
Al7 Al12 2.9707(12) 4_666 ? 
Al8 Al12 2.7441(12) 4_666 ? 
Al8 Ge2 2.7441(12) 4_666 ? 
Al8 Al7 2.7443(16) 3_665 ? 
Al8 Al10 2.7999(15) . ? 
Al8 Al5 2.8385(16) 2_665 ? 
Al8 Al3 2.9037(16) 3_665 ? 
Al8 Al4 2.9151(16) 5_556 ? 
Al8 Al9 2.9969(16) . ? 
Al9 Mn3 2.3819(12) 2 ? 
Al9 Al10 2.7493(16) . ? 
Al9 Al5 2.7716(16) 2_665 ? 
Al9 Al2 2.8369(16) 6 ? 
Al9 Al2 2.8809(16) 2 ? 
Al9 Al7 2.9148(16) 2 ? 
Al9 Al1 2.9648(13) 4 ? 
Al10 Al10 2.5964(16) 6_556 ? 
Al10 Al10 2.5964(16) 5_556 ? 
Al10 Mn3 2.6290(12) 6_556 ? 
Al10 Mn3 2.6454(13) 2 ? 
Al10 Al1 2.6666(16) 4 ? 
Al10 Al4 2.7777(16) 5_556 ? 
  
loop_ 
 _geom_angle_atom_site_label_1 
 _geom_angle_atom_site_label_2 
 _geom_angle_atom_site_label_3 
 _geom_angle 
 _geom_angle_site_symmetry_1 
 _geom_angle_site_symmetry_3 
 _geom_angle_publ_flag 
Al5 Mn1 Al5 72.12(5) . 3_565 ? 
Al5 Mn1 Al5 72.12(5) . 2_665 ? 
Al5 Mn1 Al5 72.12(5) 3_565 2_665 ? 
Al5 Mn1 Al4 72.78(4) . 3_565 ? 
Al5 Mn1 Al4 70.22(4) 3_565 3_565 ? 
Al5 Mn1 Al4 134.51(5) 2_665 3_565 ? 
Al5 Mn1 Al4 70.22(4) . . ? 
Al5 Mn1 Al4 134.51(5) 3_565 . ? 
Al5 Mn1 Al4 72.78(4) 2_665 . ? 
Al4 Mn1 Al4 119.909(4) 3_565 . ? 
Al5 Mn1 Al4 134.51(5) . 2_665 ? 
Al5 Mn1 Al4 72.78(4) 3_565 2_665 ? 
Al5 Mn1 Al4 70.22(4) 2_665 2_665 ? 
Al4 Mn1 Al4 119.909(4) 3_565 2_665 ? 
Al4 Mn1 Al4 119.909(4) . 2_665 ? 
Al5 Mn1 Al3 132.69(4) . 4_666 ? 
Al5 Mn1 Al3 76.20(4) 3_565 4_666 ? 
Al5 Mn1 Al3 128.80(4) 2_665 4_666 ? 
Al4 Mn1 Al3 63.82(4) 3_565 4_666 ? 
Al4 Mn1 Al3 149.28(5) . 4_666 ? 
Al4 Mn1 Al3 62.46(4) 2_665 4_666 ? 
Al5 Mn1 Al3 76.20(4) . 5_566 ? 
Al5 Mn1 Al3 128.80(4) 3_565 5_566 ? 
Al5 Mn1 Al3 132.69(4) 2_665 5_566 ? 
Al4 Mn1 Al3 62.46(4) 3_565 5_566 ? 
Al4 Mn1 Al3 63.82(4) . 5_566 ? 
Al4 Mn1 Al3 149.28(5) 2_665 5_566 ? 
Al3 Mn1 Al3 98.51(4) 4_666 5_566 ? 
Al5 Mn1 Al3 128.80(4) . 6_556 ? 
Al5 Mn1 Al3 132.69(4) 3_565 6_556 ? 
Al5 Mn1 Al3 76.20(4) 2_665 6_556 ? 
Al4 Mn1 Al3 149.28(5) 3_565 6_556 ? 
Al4 Mn1 Al3 62.46(4) . 6_556 ? 
Al4 Mn1 Al3 63.82(4) 2_665 6_556 ? 
Al3 Mn1 Al3 98.51(4) 4_666 6_556 ? 
Al3 Mn1 Al3 98.51(4) 5_566 6_556 ? 
Al5 Mn1 Ge2 137.18(3) . . ? 
Al5 Mn1 Ge2 137.18(3) 3_565 . ? 
Al5 Mn1 Ge2 137.18(3) 2_665 . ? 
Al4 Mn1 Ge2 88.27(3) 3_565 . ? 
Al4 Mn1 Ge2 88.27(3) . . ? 
Al4 Mn1 Ge2 88.27(3) 2_665 . ? 
Al3 Mn1 Ge2 61.02(3) 4_666 . ? 
Al3 Mn1 Ge2 61.02(3) 5_566 . ? 
Al3 Mn1 Ge2 61.02(3) 6_556 . ? 
Al9 Mn2 Al5 69.83(4) . 2_665 ? 
Al9 Mn2 Al7 125.58(4) . 6 ? 
Al5 Mn2 Al7 144.51(4) 2_665 6 ? 
Al9 Mn2 Al6 126.15(4) . 2_665 ? 
Al5 Mn2 Al6 74.55(4) 2_665 2_665 ? 
Al7 Mn2 Al6 71.17(4) 6 2_665 ? 
Al9 Mn2 Al6 68.18(4) . . ? 
Al5 Mn2 Al6 80.85(4) 2_665 . ? 
Al7 Mn2 Al6 77.80(4) 6 . ? 
Al6 Mn2 Al6 67.35(5) 2_665 . ? 
Al9 Mn2 Al6 126.78(4) . 5 ? 
Al5 Mn2 Al6 130.38(4) 2_665 5 ? 
Al7 Mn2 Al6 70.00(4) 6 5 ? 
Al6 Mn2 Al6 107.03(3) 2_665 5 ? 
Al6 Mn2 Al6 147.09(2) . 5 ? 
Al9 Mn2 Al8 73.11(4) . . ? 
Al5 Mn2 Al8 68.21(4) 2_665 . ? 
Al7 Mn2 Al8 143.06(4) 6 . ? 
Al6 Mn2 Al8 127.23(4) 2_665 . ? 
Al6 Mn2 Al8 136.79(4) . . ? 
Al6 Mn2 Al8 73.64(4) 5 . ? 
Al9 Mn2 Al7 126.56(4) . 3_665 ? 
Al5 Mn2 Al7 67.11(4) 2_665 3_665 ? 
Al7 Mn2 Al7 107.84(3) 6 3_665 ? 
Al6 Mn2 Al7 69.20(3) 2_665 3_665 ? 
Al6 Mn2 Al7 131.24(4) . 3_665 ? 
Al6 Mn2 Al7 67.71(3) 5 3_665 ? 
Al8 Mn2 Al7 62.57(4) . 3_665 ? 
Al9 Mn2 Al2 65.97(4) . 6 ? 
Al5 Mn2 Al2 129.33(4) 2_665 6 ? 
Al7 Mn2 Al2 60.52(4) 6 6 ? 
Al6 Mn2 Al2 113.84(4) 2_665 6 ? 
Al6 Mn2 Al2 60.76(3) . 6 ? 
Al6 Mn2 Al2 96.34(4) 5 6 ? 
Al8 Mn2 Al2 118.55(4) . 6 ? 
Al7 Mn2 Al2 163.48(4) 3_665 6 ? 
Al9 Mn2 Al2 67.85(4) . . ? 
Al5 Mn2 Al2 117.58(4) 2_665 . ? 
Al7 Mn2 Al2 97.72(4) 6 . ? 
Al6 Mn2 Al2 165.42(4) 2_665 . ? 
Al6 Mn2 Al2 120.59(4) . . ? 
Al6 Mn2 Al2 59.31(3) 5 . ? 
Al8 Mn2 Al2 56.97(3) . . ? 
Al7 Mn2 Al2 106.85(4) 3_665 . ? 
Al2 Mn2 Al2 65.88(4) 6 . ? 
Al9 Mn2 Mn2 178.13(4) . 4_665 ? 
Al5 Mn2 Mn2 109.50(4) 2_665 4_665 ? 
Al7 Mn2 Mn2 56.00(3) 6 4_665 ? 
Al6 Mn2 Mn2 54.84(3) 2_665 4_665 ? 
Al6 Mn2 Mn2 113.55(4) . 4_665 ? 
Al6 Mn2 Mn2 52.20(3) 5 4_665 ? 
Al8 Mn2 Mn2 105.02(3) . 4_665 ? 
Al7 Mn2 Mn2 51.85(3) 3_665 4_665 ? 
Al2 Mn2 Mn2 115.36(4) 6 4_665 ? 
Al2 Mn2 Mn2 111.31(3) . 4_665 ? 
Al9 Mn3 Al10 131.03(4) 3 . ? 
Al9 Mn3 Al4 76.68(4) 3 3 ? 
Al10 Mn3 Al4 125.76(4) . 3 ? 
Al9 Mn3 Al8 126.85(4) 3 . ? 
Al10 Mn3 Al8 67.25(4) . . ? 
Al4 Mn3 Al8 139.60(4) 3 . ? 
Al9 Mn3 Al3 119.22(4) 3 . ? 
Al10 Mn3 Al3 109.43(4) . . ? 
Al4 Mn3 Al3 61.83(4) 3 . ? 
Al8 Mn3 Al3 77.78(4) . . ? 
Al9 Mn3 Al7 71.13(4) 3 . ? 
Al10 Mn3 Al7 140.56(4) . . ? 
Al4 Mn3 Al7 87.73(4) 3 . ? 
Al8 Mn3 Al7 73.59(4) . . ? 
Al3 Mn3 Al7 65.20(4) . . ? 
Al9 Mn3 Al10 122.90(4) 3 5_556 ? 
Al10 Mn3 Al10 60.81(4) . 5_556 ? 
Al4 Mn3 Al10 65.14(4) 3 5_556 ? 
Al8 Mn3 Al10 109.46(4) . 5_556 ? 
Al3 Mn3 Al10 78.10(4) . 5_556 ? 
Al7 Mn3 Al10 141.88(4) . 5_556 ? 
Al9 Mn3 Al10 66.06(4) 3 3 ? 
Al10 Mn3 Al10 86.42(5) . 3 ? 
Al4 Mn3 Al10 61.67(4) 3 3 ? 
Al8 Mn3 Al10 152.90(4) . 3 ? 
Al3 Mn3 Al10 119.06(4) . 3 ? 
Al7 Mn3 Al10 131.58(4) . 3 ? 
Al10 Mn3 Al10 58.98(4) 5_556 3 ? 
Al9 Mn3 Al2 68.63(4) 3 . ? 
Al10 Mn3 Al2 94.59(4) . . ? 
Al4 Mn3 Al2 138.57(4) 3 . ? 
Al8 Mn3 Al2 59.65(3) . . ? 
Al3 Mn3 Al2 117.48(4) . . ? 
Al7 Mn3 Al2 60.43(4) . . ? 
Al10 Mn3 Al2 155.01(4) 5_556 . ? 
Al10 Mn3 Al2 119.27(4) 3 . ? 
Al9 Mn3 Al1 70.18(4) 3 4 ? 
Al10 Mn3 Al1 60.89(4) . 4 ? 
Al4 Mn3 Al1 119.73(4) 3 4 ? 
Al8 Mn3 Al1 100.19(3) . 4 ? 
Al3 Mn3 Al1 169.69(5) . 4 ? 
Al7 Mn3 Al1 124.21(5) . 4 ? 
Al10 Mn3 Al1 93.26(5) 5_556 4 ? 
Al10 Mn3 Al1 59.22(3) 3 4 ? 
Al2 Mn3 Al1 68.80(4) . 4 ? 
Al1 Ge1 Al1 180.0 . 4 ? 
Al1 Ge1 Al2 70.93(2) . 4 ? 
Al1 Ge1 Al2 109.07(2) 4 4 ? 
Al1 Ge1 Al2 109.07(2) . . ? 
Al1 Ge1 Al2 70.93(2) 4 . ? 
Al2 Ge1 Al2 180.00(3) 4 . ? 
Al1 Ge1 Al2 70.93(2) . 6 ? 
Al1 Ge1 Al2 109.07(2) 4 6 ? 
Al2 Ge1 Al2 109.87(2) 4 6 ? 
Al2 Ge1 Al2 70.13(2) . 6 ? 
Al1 Ge1 Al2 109.07(2) . 3 ? 
Al1 Ge1 Al2 70.93(2) 4 3 ? 
Al2 Ge1 Al2 70.13(2) 4 3 ? 
Al2 Ge1 Al2 109.87(2) . 3 ? 
Al2 Ge1 Al2 180.00(3) 6 3 ? 
Al1 Ge1 Al2 70.93(2) . 5 ? 
Al1 Ge1 Al2 109.07(2) 4 5 ? 
Al2 Ge1 Al2 109.87(2) 4 5 ? 
Al2 Ge1 Al2 70.13(2) . 5 ? 
Al2 Ge1 Al2 109.87(2) 6 5 ? 
Al2 Ge1 Al2 70.13(2) 3 5 ? 
Al1 Ge1 Al2 109.07(2) . 2 ? 
Al1 Ge1 Al2 70.93(2) 4 2 ? 
Al2 Ge1 Al2 70.13(2) 4 2 ? 
Al2 Ge1 Al2 109.87(2) . 2 ? 
Al2 Ge1 Al2 70.13(2) 6 2 ? 
Al2 Ge1 Al2 109.87(2) 3 2 ? 
Al2 Ge1 Al2 180.00(3) 5 2 ? 
Al8 Ge2 Al8 119.820(5) 5_566 6_556 ? 
Al8 Ge2 Al8 119.820(5) 5_566 4_666 ? 
Al8 Ge2 Al8 119.820(4) 6_556 4_666 ? 
Al8 Ge2 Al3 71.89(3) 5_566 5_566 ? 
Al8 Ge2 Al3 63.83(3) 6_556 5_566 ? 
Al8 Ge2 Al3 145.82(4) 4_666 5_566 ? 
Al8 Ge2 Al3 63.83(3) 5_566 4_666 ? 
Al8 Ge2 Al3 145.82(4) 6_556 4_666 ? 
Al8 Ge2 Al3 71.89(3) 4_666 4_666 ? 
Al3 Ge2 Al3 88.59(4) 5_566 4_666 ? 
Al8 Ge2 Al3 145.82(4) 5_566 6_556 ? 
Al8 Ge2 Al3 71.89(3) 6_556 6_556 ? 
Al8 Ge2 Al3 63.83(3) 4_666 6_556 ? 
Al3 Ge2 Al3 88.59(4) 5_566 6_556 ? 
Al3 Ge2 Al3 88.59(4) 4_666 6_556 ? 
Al8 Ge2 Mn1 92.44(3) 5_566 . ? 
Al8 Ge2 Mn1 92.44(3) 6_556 . ? 
Al8 Ge2 Mn1 92.44(3) 4_666 . ? 
Al3 Ge2 Mn1 53.75(3) 5_566 . ? 
Al3 Ge2 Mn1 53.75(3) 4_666 . ? 
Al3 Ge2 Mn1 53.75(3) 6_556 . ? 
Ge1 Al1 Al10 130.31(4) . 4 ? 
Ge1 Al1 Al10 130.31(4) . 6 ? 
Al10 Al1 Al10 82.65(6) 4 6 ? 
Ge1 Al1 Al10 130.31(4) . 5 ? 
Al10 Al1 Al10 82.65(6) 4 5 ? 
Al10 Al1 Al10 82.65(6) 6 5 ? 
Ge1 Al1 Mn3 106.54(4) . 6 ? 
Al10 Al1 Mn3 123.11(7) 4 6 ? 
Al10 Al1 Mn3 54.86(3) 6 6 ? 
Al10 Al1 Mn3 58.46(3) 5 6 ? 
Ge1 Al1 Mn3 106.54(4) . 5 ? 
Al10 Al1 Mn3 58.46(3) 4 5 ? 
Al10 Al1 Mn3 123.11(7) 6 5 ? 
Al10 Al1 Mn3 54.86(3) 5 5 ? 
Mn3 Al1 Mn3 112.24(3) 6 5 ? 
Ge1 Al1 Mn3 106.54(4) . 4 ? 
Al10 Al1 Mn3 54.86(3) 4 4 ? 
Al10 Al1 Mn3 58.46(3) 6 4 ? 
Al10 Al1 Mn3 123.11(7) 5 4 ? 
Mn3 Al1 Mn3 112.24(3) 6 4 ? 
Mn3 Al1 Mn3 112.24(3) 5 4 ? 
Ge1 Al1 Al9 76.30(4) . 5 ? 
Al10 Al1 Al9 138.29(5) 4 5 ? 
Al10 Al1 Al9 103.93(4) 6 5 ? 
Al10 Al1 Al9 58.16(3) 5 5 ? 
Mn3 Al1 Al9 49.10(2) 6 5 ? 
Mn3 Al1 Al9 85.36(2) 5 5 ? 
Mn3 Al1 Al9 159.69(3) 4 5 ? 
Ge1 Al1 Al9 76.30(4) . 4 ? 
Al10 Al1 Al9 58.16(3) 4 4 ? 
Al10 Al1 Al9 138.29(5) 6 4 ? 
Al10 Al1 Al9 103.93(4) 5 4 ? 
Mn3 Al1 Al9 159.69(3) 6 4 ? 
Mn3 Al1 Al9 49.10(2) 5 4 ? 
Mn3 Al1 Al9 85.36(2) 4 4 ? 
Al9 Al1 Al9 114.57(3) 5 4 ? 
Ge1 Al1 Al9 76.30(4) . 6 ? 
Al10 Al1 Al9 103.93(4) 4 6 ? 
Al10 Al1 Al9 58.16(3) 6 6 ? 
Al10 Al1 Al9 138.29(5) 5 6 ? 
Mn3 Al1 Al9 85.36(2) 6 6 ? 
Mn3 Al1 Al9 159.69(3) 5 6 ? 
Mn3 Al1 Al9 49.10(2) 4 6 ? 
Al9 Al1 Al9 114.57(3) 5 6 ? 
Al9 Al1 Al9 114.57(3) 4 6 ? 
Al8 Al2 Ge1 137.66(5) . . ? 
Al8 Al2 Al7 71.59(4) . . ? 
Ge1 Al2 Al7 137.97(5) . . ? 
Al8 Al2 Mn3 57.39(4) . . ? 
Ge1 Al2 Mn3 107.10(4) . . ? 
Al7 Al2 Mn3 58.17(3) . . ? 
Al8 Al2 Al6 71.94(4) . 5 ? 
Ge1 Al2 Al6 135.72(5) . 5 ? 
Al7 Al2 Al6 73.12(4) . 5 ? 
Mn3 Al2 Al6 117.15(5) . 5 ? 
Al8 Al2 Mn2 112.58(5) . 5 ? 
Ge1 Al2 Mn2 109.75(4) . 5 ? 
Al7 Al2 Mn2 55.20(3) . 5 ? 
Mn3 Al2 Mn2 111.04(4) . 5 ? 
Al6 Al2 Mn2 56.31(3) 5 5 ? 
Al8 Al2 Al9 130.43(5) . 5 ? 
Ge1 Al2 Al9 78.20(4) . 5 ? 
Al7 Al2 Al9 105.33(5) . 5 ? 
Mn3 Al2 Al9 160.86(5) . 5 ? 
Al6 Al2 Al9 60.61(4) 5 5 ? 
Mn2 Al2 Al9 50.74(3) 5 5 ? 
Al8 Al2 Mn2 56.85(3) . . ? 
Ge1 Al2 Mn2 107.21(4) . . ? 
Al7 Al2 Mn2 114.82(5) . . ? 
Mn3 Al2 Mn2 111.14(4) . . ? 
Al6 Al2 Mn2 55.88(3) 5 . ? 
Mn2 Al2 Mn2 110.47(4) 5 . ? 
Al9 Al2 Mn2 83.82(4) 5 . ? 
Al8 Al2 Al9 106.78(5) . 3 ? 
Ge1 Al2 Al9 77.42(4) . 3 ? 
Al7 Al2 Al9 63.09(4) . 3 ? 
Mn3 Al2 Al9 50.35(3) . 3 ? 
Al6 Al2 Al9 133.29(5) 5 3 ? 
Mn2 Al2 Al9 84.57(4) 5 3 ? 
Al9 Al2 Al9 115.50(5) 5 3 ? 
Mn2 Al2 Al9 160.64(5) . 3 ? 
Al8 Al2 Al9 64.57(4) . . ? 
Ge1 Al2 Al9 75.99(3) . . ? 
Al7 Al2 Al9 134.07(5) . . ? 
Mn3 Al2 Al9 86.16(4) . . ? 
Al6 Al2 Al9 104.38(5) 5 . ? 
Mn2 Al2 Al9 158.15(5) 5 . ? 
Al9 Al2 Al9 112.96(5) 5 . ? 
Mn2 Al2 Al9 48.74(3) . . ? 
Al9 Al2 Al9 117.23(6) 3 . ? 
Mn1 Al3 Mn3 131.32(5) 4_666 . ? 
Mn1 Al3 Al4 58.60(3) 4_666 5_556 ? 
Mn3 Al3 Al4 75.98(4) . 5_556 ? 
Mn1 Al3 Al4 147.68(6) 4_666 3 ? 
Mn3 Al3 Al4 58.20(4) . 3 ? 
Al4 Al3 Al4 106.77(6) 5_556 3 ? 
Mn1 Al3 Al4 57.93(3) 4_666 6_656 ? 
Mn3 Al3 Al4 170.18(5) . 6_656 ? 
Al4 Al3 Al4 111.23(6) 5_556 6_656 ? 
Al4 Al3 Al4 112.42(5) 3 6_656 ? 
Mn1 Al3 Al12 65.23(4) 4_666 4_666 ? 
Mn3 Al3 Al12 99.51(4) . 4_666 ? 
Al4 Al3 Al12 88.59(4) 5_556 4_666 ? 
Al4 Al3 Al12 146.90(5) 3 4_666 ? 
Al4 Al3 Al12 87.56(4) 6_656 4_666 ? 
Mn1 Al3 Ge2 65.23(4) 4_666 4_666 ? 
Mn3 Al3 Ge2 99.51(4) . 4_666 ? 
Al4 Al3 Ge2 88.59(4) 5_556 4_666 ? 
Al4 Al3 Ge2 146.90(5) 3 4_666 ? 
Al4 Al3 Ge2 87.56(4) 6_656 4_666 ? 
Al12 Al3 Ge2 0.00(3) 4_666 4_666 ? 
Mn1 Al3 Al7 129.97(5) 4_666 . ? 
Mn3 Al3 Al7 58.13(3) . . ? 
Al4 Al3 Al7 119.16(5) 5_556 . ? 
Al4 Al3 Al7 82.22(5) 3 . ? 
Al4 Al3 Al7 120.25(5) 6_656 . ? 
Al12 Al3 Al7 64.75(4) 4_666 . ? 
Ge2 Al3 Al7 64.75(4) 4_666 . ? 
Mn1 Al3 Al8 95.79(4) 4_666 2_655 ? 
Mn3 Al3 Al8 115.26(5) . 2_655 ? 
Al4 Al3 Al8 145.42(5) 5_556 2_655 ? 
Al4 Al3 Al8 106.61(5) 3 2_655 ? 
Al4 Al3 Al8 62.87(4) 6_656 2_655 ? 
Al12 Al3 Al8 58.01(3) 4_666 2_655 ? 
Ge2 Al3 Al8 58.01(3) 4_666 2_655 ? 
Al7 Al3 Al8 57.50(4) . 2_655 ? 
Mn1 Al3 Al3 105.70(6) 4_666 4_656 ? 
Mn3 Al3 Al3 115.15(6) . 4_656 ? 
Al4 Al3 Al3 125.83(6) 5_556 4_656 ? 
Al4 Al3 Al3 57.02(4) 3 4_656 ? 
Al4 Al3 Al3 55.39(4) 6_656 4_656 ? 
Al12 Al3 Al3 135.01(6) 4_666 4_656 ? 
Ge2 Al3 Al3 135.01(6) 4_666 4_656 ? 
Al7 Al3 Al3 109.67(6) . 4_656 ? 
Al8 Al3 Al3 80.83(5) 2_655 4_656 ? 
Mn1 Al4 Mn3 148.08(6) . 2 ? 
Mn1 Al4 Al3 58.94(4) . 6_556 ? 
Mn3 Al4 Al3 138.16(5) 2 6_556 ? 
Mn1 Al4 Al3 116.38(5) . 2 ? 
Mn3 Al4 Al3 59.97(4) 2 2 ? 
Al3 Al4 Al3 155.43(5) 6_556 2 ? 
Mn1 Al4 Al10 125.21(5) . . ? 
Mn3 Al4 Al10 61.33(3) 2 . ? 
Al3 Al4 Al10 76.86(5) 6_556 . ? 
Al3 Al4 Al10 117.04(5) 2 . ? 
Mn1 Al4 Al3 58.26(3) . 5_566 ? 
Mn3 Al4 Al3 127.46(5) 2 5_566 ? 
Al3 Al4 Al3 92.91(6) 6_556 5_566 ? 
Al3 Al4 Al3 67.58(5) 2 5_566 ? 
Al10 Al4 Al3 161.10(6) . 5_566 ? 
Mn1 Al4 Al10 152.72(6) . 6_556 ? 
Mn3 Al4 Al10 59.18(4) 2 6_556 ? 
Al3 Al4 Al10 100.08(5) 6_556 6_556 ? 
Al3 Al4 Al10 74.72(4) 2 6_556 ? 
Al10 Al4 Al10 57.06(5) . 6_556 ? 
Al3 Al4 Al10 110.50(5) 5_566 6_556 ? 
Mn1 Al4 Al5 53.31(4) . . ? 
Mn3 Al4 Al5 97.45(5) 2 . ? 
Al3 Al4 Al5 109.66(5) 6_556 . ? 
Al3 Al4 Al5 77.44(4) 2 . ? 
Al10 Al4 Al5 131.00(5) . . ? 
Al3 Al4 Al5 67.27(4) 5_566 . ? 
Al10 Al4 Al5 150.21(5) 6_556 . ? 
Mn1 Al4 Al8 95.71(5) . 6_556 ? 
Mn3 Al4 Al8 114.85(5) 2 6_556 ? 
Al3 Al4 Al8 71.00(4) 6_556 6_556 ? 
Al3 Al4 Al8 86.28(5) 2 6_556 ? 
Al10 Al4 Al8 98.94(5) . 6_556 ? 
Al3 Al4 Al8 62.43(4) 5_566 6_556 ? 
Al10 Al4 Al8 58.86(4) 6_556 6_556 ? 
Al5 Al4 Al8 129.62(5) . 6_556 ? 
Mn1 Al4 Al5 52.11(3) . 2_665 ? 
Mn3 Al4 Al5 104.52(5) 2 2_665 ? 
Al3 Al4 Al5 66.55(4) 6_556 2_665 ? 
Al3 Al4 Al5 132.30(6) 2 2_665 ? 
Al10 Al4 Al5 82.69(4) . 2_665 ? 
Al3 Al4 Al5 108.06(5) 5_566 2_665 ? 
Al10 Al4 Al5 139.73(5) 6_556 2_665 ? 
Al5 Al4 Al5 59.16(5) . 2_665 ? 
Al8 Al4 Al5 135.94(5) 6_556 2_665 ? 
Mn1 Al5 Mn2 163.39(6) . 3_565 ? 
Mn1 Al5 Al9 116.22(5) . 3_565 ? 
Mn2 Al5 Al9 54.54(3) 3_565 3_565 ? 
Mn1 Al5 Al7 133.90(5) . 2 ? 
Mn2 Al5 Al7 60.31(3) 3_565 2 ? 
Al9 Al5 Al7 108.05(5) 3_565 2 ? 
Mn1 Al5 Al8 133.00(5) . 3_565 ? 
Mn2 Al5 Al8 58.93(3) 3_565 3_565 ? 
Al9 Al5 Al8 64.57(4) 3_565 3_565 ? 
Al7 Al5 Al8 57.95(4) 2 3_565 ? 
Mn1 Al5 Al4 56.47(3) . . ? 
Mn2 Al5 Al4 138.07(5) 3_565 . ? 
Al9 Al5 Al4 155.90(5) 3_565 . ? 
Al7 Al5 Al4 77.87(4) 2 . ? 
Al8 Al5 Al4 102.45(5) 3_565 . ? 
Mn1 Al5 Al5 53.94(2) . 3_565 ? 
Mn2 Al5 Al5 109.44(4) 3_565 3_565 ? 
Al9 Al5 Al5 79.58(6) 3_565 3_565 ? 
Al7 Al5 Al5 152.29(4) 2 3_565 ? 
Al8 Al5 Al5 142.34(7) 3_565 3_565 ? 
Al4 Al5 Al5 106.30(4) . 3_565 ? 
Mn1 Al5 Al5 53.94(2) . 2_665 ? 
Mn2 Al5 Al5 120.70(3) 3_565 2_665 ? 
Al9 Al5 Al5 135.74(5) 3_565 2_665 ? 
Al7 Al5 Al5 101.27(6) 2 2_665 ? 
Al8 Al5 Al5 157.65(7) 3_565 2_665 ? 
Al4 Al5 Al5 61.98(4) . 2_665 ? 
Al5 Al5 Al5 60.0 3_565 2_665 ? 
Mn1 Al5 Al4 55.12(3) . 3_565 ? 
Mn2 Al5 Al4 118.90(5) 3_565 3_565 ? 
Al9 Al5 Al4 64.45(4) 3_565 3_565 ? 
Al7 Al5 Al4 148.72(5) 2 3_565 ? 
Al8 Al5 Al4 93.68(4) 3_565 3_565 ? 
Al4 Al5 Al4 98.03(6) . 3_565 ? 
Al5 Al5 Al4 58.86(4) 3_565 3_565 ? 
Al5 Al5 Al4 103.96(4) 2_665 3_565 ? 
Mn2 Al6 Mn2 152.13(5) 3_565 . ? 
Mn2 Al6 Mn2 72.97(3) 3_565 6 ? 
Mn2 Al6 Mn2 125.41(5) . 6 ? 
Mn2 Al6 Al2 137.42(5) 3_565 6 ? 
Mn2 Al6 Al2 62.93(3) . 6 ? 
Mn2 Al6 Al2 64.81(4) 6 6 ? 
Mn2 Al6 Al9 113.90(5) 3_565 . ? 
Mn2 Al6 Al9 52.74(3) . . ? 
Mn2 Al6 Al9 89.09(4) 6 . ? 
Al2 Al6 Al9 61.78(4) 6 . ? 
Mn2 Al6 Al6 115.61(4) 3_565 2_665 ? 
Mn2 Al6 Al6 55.27(4) . 2_665 ? 
Mn2 Al6 Al6 160.06(3) 6 2_665 ? 
Al2 Al6 Al6 106.20(6) 6 2_665 ? 
Al9 Al6 Al6 102.40(5) . 2_665 ? 
Mn2 Al6 Al6 57.38(4) 3_565 3_565 ? 
Mn2 Al6 Al6 113.57(4) . 3_565 ? 
Mn2 Al6 Al6 120.35(6) 6 3_565 ? 
Al2 Al6 Al6 154.76(4) 6 3_565 ? 
Al9 Al6 Al6 138.39(3) . 3_565 ? 
Al6 Al6 Al6 60.0 2_665 3_565 ? 
Mn2 Al6 Al7 54.40(3) 3_565 5_565 ? 
Mn2 Al6 Al7 151.42(5) . 5_565 ? 
Mn2 Al6 Al7 56.93(3) 6 5_565 ? 
Al2 Al6 Al7 103.21(5) 6 5_565 ? 
Al9 Al6 Al7 145.49(5) . 5_565 ? 
Al6 Al6 Al7 111.86(4) 2_665 5_565 ? 
Al6 Al6 Al7 67.54(4) 3_565 5_565 ? 
Mn2 Al6 Al7 57.58(3) 3_565 2 ? 
Mn2 Al6 Al7 113.30(4) . 2 ? 
Mn2 Al6 Al7 53.59(3) 6 2 ? 
Al2 Al6 Al7 91.48(4) 6 2 ? 
Al9 Al6 Al7 60.77(4) . 2 ? 
Al6 Al6 Al7 146.34(3) 2_665 2 ? 
Al6 Al6 Al7 111.52(5) 3_565 2 ? 
Al7 Al6 Al7 90.83(4) 5_565 2 ? 
Mn2 Al7 Mn3 122.73(5) 5 . ? 
Mn2 Al7 Mn2 72.16(3) 5 2_655 ? 
Mn3 Al7 Mn2 147.16(5) . 2_655 ? 
Mn2 Al7 Al2 64.28(4) 5 . ? 
Mn3 Al7 Al2 61.41(4) . . ? 
Mn2 Al7 Al2 134.68(5) 2_655 . ? 
Mn2 Al7 Al8 117.70(5) 5 2_655 ? 
Mn3 Al7 Al8 119.43(5) . 2_655 ? 
Mn2 Al7 Al8 57.87(3) 2_655 2_655 ? 
Al2 Al7 Al8 158.50(5) . 2_655 ? 
Mn2 Al7 Al3 170.05(5) 5 . ? 
Mn3 Al7 Al3 56.66(3) . . ? 
Mn2 Al7 Al3 113.95(5) 2_655 . ? 
Al2 Al7 Al3 110.98(5) . . ? 
Al8 Al7 Al3 63.17(4) 2_655 . ? 
Mn2 Al7 Al5 114.39(5) 5 3 ? 
Mn3 Al7 Al5 95.95(4) . 3 ? 
Mn2 Al7 Al5 52.58(3) 2_655 3 ? 
Al2 Al7 Al5 139.44(5) . 3 ? 
Al8 Al7 Al5 61.24(4) 2_655 3 ? 
Al3 Al7 Al5 75.08(4) . 3 ? 
Mn2 Al7 Al9 88.42(4) 5 3 ? 
Mn3 Al7 Al9 50.65(3) . 3 ? 
Mn2 Al7 Al9 106.51(4) 2_655 3 ? 
Al2 Al7 Al9 61.81(4) . 3 ? 
Al8 Al7 Al9 137.36(5) 2_655 3 ? 
Al3 Al7 Al9 96.93(4) . 3 ? 
Al5 Al7 Al9 77.74(4) 3 3 ? 
Mn2 Al7 Al6 54.43(3) 5 6_655 ? 
Mn3 Al7 Al6 157.44(5) . 6_655 ? 
Mn2 Al7 Al6 55.36(3) 2_655 6_655 ? 
Al2 Al7 Al6 104.38(5) . 6_655 ? 
Al8 Al7 Al6 66.86(4) 2_655 6_655 ? 
Al3 Al7 Al6 121.59(5) . 6_655 ? 
Al5 Al7 Al6 105.33(5) 3 6_655 ? 
Al9 Al7 Al6 141.10(5) 3 6_655 ? 
Mn2 Al7 Al6 56.41(3) 5 3 ? 
Mn3 Al7 Al6 107.53(4) . 3 ? 
Mn2 Al7 Al6 53.22(3) 2_655 3 ? 
Al2 Al7 Al6 90.90(4) . 3 ? 
Al8 Al7 Al6 108.04(5) 2_655 3 ? 
Al3 Al7 Al6 133.47(5) . 3 ? 
Al5 Al7 Al6 62.70(4) 3 3 ? 
Al9 Al7 Al6 57.12(4) 3 3 ? 
Al6 Al7 Al6 89.17(4) 6_655 3 ? 
Mn2 Al7 Al12 114.53(4) 5 4_666 ? 
Mn3 Al7 Al12 93.12(4) . 4_666 ? 
Mn2 Al7 Al12 107.21(4) 2_655 4_666 ? 
Al2 Al7 Al12 101.73(4) . 4_666 ? 
Al8 Al7 Al12 57.23(3) 2_655 4_666 ? 
Al3 Al7 Al12 56.80(3) . 4_666 ? 
Al5 Al7 Al12 113.42(4) 3 4_666 ? 
Al9 Al7 Al12 143.68(5) 3 4_666 ? 
Al6 Al7 Al12 71.77(4) 6_655 4_666 ? 
Al6 Al7 Al12 159.16(5) 3 4_666 ? 
Mn3 Al8 Mn2 125.00(4) . . ? 
Mn3 Al8 Al2 62.96(4) . . ? 
Mn2 Al8 Al2 66.18(4) . . ? 
Mn3 Al8 Al12 100.04(4) . 4_666 ? 
Mn2 Al8 Al12 115.70(4) . 4_666 ? 
Al2 Al8 Al12 109.67(5) . 4_666 ? 
Mn3 Al8 Ge2 100.04(4) . 4_666 ? 
Mn2 Al8 Ge2 115.70(4) . 4_666 ? 
Al2 Al8 Ge2 109.67(5) . 4_666 ? 
Al12 Al8 Ge2 0.00(3) 4_666 4_666 ? 
Mn3 Al8 Al7 162.85(5) . 3_665 ? 
Mn2 Al8 Al7 59.56(3) . 3_665 ? 
Al2 Al8 Al7 111.63(5) . 3_665 ? 
Al12 Al8 Al7 65.54(3) 4_666 3_665 ? 
Ge2 Al8 Al7 65.54(3) 4_666 3_665 ? 
Mn3 Al8 Al10 55.29(3) . . ? 
Mn2 Al8 Al10 106.16(4) . . ? 
Al2 Al8 Al10 89.69(5) . . ? 
Al12 Al8 Al10 137.99(5) 4_666 . ? 
Ge2 Al8 Al10 137.99(5) 4_666 . ? 
Al7 Al8 Al10 141.75(5) 3_665 . ? 
Mn3 Al8 Al5 136.15(5) . 2_665 ? 
Mn2 Al8 Al5 52.86(3) . 2_665 ? 
Al2 Al8 Al5 112.29(5) . 2_665 ? 
Al12 Al8 Al5 120.50(4) 4_666 2_665 ? 
Ge2 Al8 Al5 120.50(4) 4_666 2_665 ? 
Al7 Al8 Al5 60.82(4) 3_665 2_665 ? 
Al10 Al8 Al5 82.05(4) . 2_665 ? 
Mn3 Al8 Al3 122.29(5) . 3_665 ? 
Mn2 Al8 Al3 112.07(4) . 3_665 ? 
Al2 Al8 Al3 166.45(5) . 3_665 ? 
Al12 Al8 Al3 58.16(3) 4_666 3_665 ? 
Ge2 Al8 Al3 58.16(3) 4_666 3_665 ? 
Al7 Al8 Al3 59.34(4) 3_665 3_665 ? 
Al10 Al8 Al3 103.49(5) . 3_665 ? 
Al5 Al8 Al3 73.30(4) 2_665 3_665 ? 
Mn3 Al8 Al4 71.20(4) . 5_556 ? 
Mn2 Al8 Al4 148.61(5) . 5_556 ? 
Al2 Al8 Al4 133.79(5) . 5_556 ? 
Al12 Al8 Al4 82.99(4) 4_666 5_556 ? 
Ge2 Al8 Al4 82.99(4) 4_666 5_556 ? 
Al7 Al8 Al4 113.94(5) 3_665 5_556 ? 
Al10 Al8 Al4 58.12(4) . 5_556 ? 
Al5 Al8 Al4 96.26(4) 2_665 5_556 ? 
Al3 Al8 Al4 54.70(4) 3_665 5_556 ? 
Mn3 Al8 Al9 88.12(4) . . ? 
Mn2 Al8 Al9 50.17(3) . . ? 
Al2 Al8 Al9 63.24(4) . . ? 
Al12 Al8 Al9 165.37(5) 4_666 . ? 
Ge2 Al8 Al9 165.37(5) 4_666 . ? 
Al7 Al8 Al9 104.13(5) 3_665 . ? 
Al10 Al8 Al9 56.50(4) . . ? 
Al5 Al8 Al9 56.64(4) 2_665 . ? 
Al3 Al8 Al9 126.95(5) 3_665 . ? 
Al4 Al8 Al9 111.27(5) 5_556 . ? 
Mn3 Al9 Mn2 169.79(6) 2 . ? 
Mn3 Al9 Al10 61.58(4) 2 . ? 
Mn2 Al9 Al10 114.26(5) . . ? 
Mn3 Al9 Al5 114.17(5) 2 2_665 ? 
Mn2 Al9 Al5 55.62(4) . 2_665 ? 
Al10 Al9 Al5 84.19(4) . 2_665 ? 
Mn3 Al9 Al6 120.03(5) 2 . ? 
Mn2 Al9 Al6 59.08(3) . . ? 
Al10 Al9 Al6 154.12(5) . . ? 
Al5 Al9 Al6 71.63(4) 2_665 . ? 
Mn3 Al9 Al2 125.83(5) 2 6 ? 
Mn2 Al9 Al2 63.28(4) . 6 ? 
Al10 Al9 Al2 145.50(5) . 6 ? 
Al5 Al9 Al2 114.32(5) 2_665 6 ? 
Al6 Al9 Al2 57.61(4) . 6 ? 
Mn3 Al9 Al2 61.02(4) 2 2 ? 
Mn2 Al9 Al2 127.97(5) . 2 ? 
Al10 Al9 Al2 110.18(5) . 2 ? 
Al5 Al9 Al2 155.63(5) 2_665 2 ? 
Al6 Al9 Al2 89.94(4) . 2 ? 
Al2 Al9 Al2 64.83(4) 6 2 ? 
Mn3 Al9 Al7 58.22(3) 2 2 ? 
Mn2 Al9 Al7 120.96(5) . 2 ? 
Al10 Al9 Al7 115.88(5) . 2 ? 
Al5 Al9 Al7 101.23(5) 2_665 2 ? 
Al6 Al9 Al7 62.11(4) . 2 ? 
Al2 Al9 Al7 89.92(4) 6 2 ? 
Al2 Al9 Al7 55.10(4) 2 2 ? 
Mn3 Al9 Al2 123.26(5) 2 . ? 
Mn2 Al9 Al2 63.41(4) . . ? 
Al10 Al9 Al2 84.00(4) . . ? 
Al5 Al9 Al2 104.52(5) 2_665 . ? 
Al6 Al9 Al2 110.44(5) . . ? 
Al2 Al9 Al2 63.76(4) 6 . ? 
Al2 Al9 Al2 96.71(5) 2 . ? 
Al7 Al9 Al2 148.94(5) 2 . ? 
Mn3 Al9 Al1 60.72(3) 2 4 ? 
Mn2 Al9 Al1 125.86(5) . 4 ? 
Al10 Al9 Al1 55.48(4) . 4 ? 
Al5 Al9 Al1 137.59(5) 2_665 4 ? 
Al6 Al9 Al1 150.10(6) . 4 ? 
Al2 Al9 Al1 96.42(5) 6 4 ? 
Al2 Al9 Al1 63.62(4) 2 4 ? 
Al7 Al9 Al1 107.58(4) 2 4 ? 
Al2 Al9 Al1 62.66(4) . 4 ? 
Mn3 Al9 Al8 119.68(5) 2 . ? 
Mn2 Al9 Al8 56.72(3) . . ? 
Al10 Al9 Al8 58.13(4) . . ? 
Al5 Al9 Al8 58.80(4) 2_665 . ? 
Al6 Al9 Al8 113.19(5) . . ? 
Al2 Al9 Al8 105.23(5) 6 . ? 
Al2 Al9 Al8 145.49(5) 2 . ? 
Al7 Al9 Al8 158.47(5) 2 . ? 
Al2 Al9 Al8 52.19(3) . . ? 
Al1 Al9 Al8 86.20(4) 4 . ? 
Mn3 Al10 Al10 137.90(4) . 6_556 ? 
Mn3 Al10 Al10 62.13(3) . 5_556 ? 
Al10 Al10 Al10 85.41(6) 6_556 5_556 ? 
Mn3 Al10 Mn3 117.48(4) . 6_556 ? 
Al10 Al10 Mn3 57.06(5) 6_556 6_556 ? 
Al10 Al10 Mn3 60.82(5) 5_556 6_556 ? 
Mn3 Al10 Mn3 125.16(5) . 2 ? 
Al10 Al10 Mn3 60.20(3) 6_556 2 ? 
Al10 Al10 Mn3 134.43(3) 5_556 2 ? 
Mn3 Al10 Mn3 112.33(4) 6_556 2 ? 
Mn3 Al10 Al4 158.01(6) . . ? 
Al10 Al10 Al4 63.87(4) 6_556 . ? 
Al10 Al10 Al4 134.90(7) 5_556 . ? 
Mn3 Al10 Al4 74.56(4) 6_556 . ? 
Mn3 Al10 Al4 57.00(3) 2 . ? 
Mn3 Al10 Al1 64.24(3) . 4 ? 
Al10 Al10 Al1 95.96(4) 6_556 4 ? 
Al10 Al10 Al1 95.96(4) 5_556 4 ? 
Mn3 Al10 Al1 143.44(6) 6_556 4 ? 
Mn3 Al10 Al1 62.32(3) 2 4 ? 
Al4 Al10 Al1 118.21(5) . 4 ? 
Mn3 Al10 Al9 95.19(4) . . ? 
Al10 Al10 Al9 110.88(5) 6_556 . ? 
Al10 Al10 Al9 156.43(6) 5_556 . ? 
Mn3 Al10 Al9 142.26(5) 6_556 . ? 
Mn3 Al10 Al9 52.36(3) 2 . ? 
Al4 Al10 Al9 68.66(4) . . ? 
Al1 Al10 Al9 66.36(4) 4 . ? 
Mn3 Al10 Al4 74.50(4) . 5_556 ? 
Al10 Al10 Al4 112.60(6) 6_556 5_556 ? 
Al10 Al10 Al4 59.07(4) 5_556 5_556 ? 
Mn3 Al10 Al4 55.69(3) 6_556 5_556 ? 
Mn3 Al10 Al4 158.60(5) 2 5_556 ? 
Al4 Al10 Al4 101.60(4) . 5_556 ? 
Al1 Al10 Al4 138.51(5) 4 5_556 ? 
Al9 Al10 Al4 124.01(5) . 5_556 ? 
Mn3 Al10 Al8 57.46(3) . . ? 
Al10 Al10 Al8 164.05(5) 6_556 . ? 
Al10 Al10 Al8 103.38(5) 5_556 . ? 
Mn3 Al10 Al8 115.49(5) 6_556 . ? 
Mn3 Al10 Al8 117.70(5) 2 . ? 
Al4 Al10 Al8 101.19(5) . . ? 
Al1 Al10 Al8 96.32(5) 4 . ? 
Al9 Al10 Al8 65.37(4) . . ? 
Al4 Al10 Al8 63.02(4) 5_556 . ? 
  
_diffrn_measured_fraction_theta_max    1.000 
_diffrn_reflns_theta_full              30.00 
_diffrn_measured_fraction_theta_full   1.000 
_refine_diff_density_max    0.898 
_refine_diff_density_min   -0.820 
_refine_diff_density_rms    0.169 
  
